# Supplementary material
Source: publisher figshare collection journal article supplement (https://acs.figshare.com/ndownloader/files/8413046)
Supplement: Supplementary file 1 [file 8413046]

1    **Supporting Information**

2    **Toward Quantitative Understanding of the Bioavailability of**  
3    **Dissolved Organic Matter in Freshwater Lake during Cyanobacteria**  
4    **Blooming**

5    Leilei Bai<sup>†,‡</sup>, Chicheng Cao<sup>§</sup>, Changhui Wang<sup>†</sup>, Huacheng Xu<sup>†</sup>, Hui Zhang<sup>§</sup>, Vera I  
6    Slaveykova<sup>‡</sup>, Helong Jiang<sup>\*,†</sup>

7

8    <sup>†</sup>State Key Laboratory of Lake Science and Environment, Nanjing Institute of Geography and  
9    Limnology, Chinese Academy of Sciences, Nanjing 210008, China

10    <sup>‡</sup>Graduate University of Chinese Academy of Sciences, Beijing 100049, China

11    <sup>§</sup>Key Laboratory of Environmental Medicine Engineering of Ministry of Education, School of  
12    Public Health, Southeast University, Nanjing, 210009, China

13    <sup>‡</sup>Department F.-A. Forel for Environmental and Aquatic Sciences, Faculty of Sciences, University  
14    of Geneva, Geneva CH-1211, Switzerland.

15

16    \*Phone/fax: +86 25 8688 2208; e-mail: hljiang@niglas.ac.cn.

17

18    Number of pages: 37

19    Number of tables: 5

20    Number of figures: 15

21

|                                                                                                                                                                                                                                                                                                                                                                                                |             |
|------------------------------------------------------------------------------------------------------------------------------------------------------------------------------------------------------------------------------------------------------------------------------------------------------------------------------------------------------------------------------------------------|-------------|
| Materials and Methods                                                                                                                                                                                                                                                                                                                                                                          | Page S4-S12 |
| Table S1. HPLC Gradient Elution Scheme                                                                                                                                                                                                                                                                                                                                                         | Page S13    |
| Table S2. FLD Parameters Setup                                                                                                                                                                                                                                                                                                                                                                 | Page S14    |
| Table S3. Changes of DOC Concentration in the 4-Stage Plug-Flow Bioreactor and Batch Inoculation ( $\text{mg L}^{-1}$ )                                                                                                                                                                                                                                                                        | Page S15    |
| Table S4. DOM Molecular Characterization after Having Passed through the 4-Stage Plug-Flow Bioreactor                                                                                                                                                                                                                                                                                          | Page S16    |
| Table S5. Molecular Characterization of the Labile DOM, Semilabile DOM, Refractory DOM and Bioproducted DOM                                                                                                                                                                                                                                                                                    | Page S17    |
| Figure S1. Location of Meiliang Bay and Taihu sampling site (coordinates: $31^{\circ}28'46.17''\text{N}$ , $120^{\circ}11'19.70''\text{S}$ ).                                                                                                                                                                                                                                                  | Page S18    |
| Figure S2. Setup and operation schemes of the 4-stage plug-flow bioreactor.                                                                                                                                                                                                                                                                                                                    | Page S19    |
| Figure S3. Concentrations and removal efficiencies of DOC in the 4-stage plug-flow bioreactor during incubation. (a) DOC concentrations, and (b) DOC removal efficiencies in each stage of the bioreactor.                                                                                                                                                                                     | Page S20    |
| Figure S4. <i>G</i> model fitting results of DOC concentrations in the 4-stage plug-flow bioreactor.                                                                                                                                                                                                                                                                                           | Page S21    |
| Figure S5. (a) CDOM absorption coefficient spectra ( $a$ , $\text{m}^{-1}$ ), (b) first derivative absorption spectra, and (c) second derivative absorption spectra of the DOM as passed through the 4-stage plug-flow bioreactor.                                                                                                                                                             | Page S22    |
| Figure S6. EEM spectrum of the 4 components identified by the PARAFAC analysis for the DOM samples and the highly overlaid excitation and emission spectra estimated using the split-half validation procedure.                                                                                                                                                                                | Page S23    |
| Figure S7. HPLC fluorescence Excitation-Time-Maps of CyanoHAB-DOM. (a) and (b) Excitation-Time-Map at $\text{Em } 324 \text{ nm}$ and the extracted chromatograms at $\text{Em } 235$ and $275 \text{ nm}$ , respectively, and (c) and (d) Excitation-Time-Map at $\text{Em } 425 \text{ nm}$ and the extracted chromatograms at $\text{Em } 230$ , $290$ and $365 \text{ nm}$ , respectively. | Page S24    |

|                                                                                                                                                                                                                                                                                                                                    |               |
|------------------------------------------------------------------------------------------------------------------------------------------------------------------------------------------------------------------------------------------------------------------------------------------------------------------------------------|---------------|
| Figure S8. HPLC fluorescence emission-time-maps at Ex 235 nm for the DOM as passed through the 4-stage plug-flow bioreactor. (a)–(e) Emission-time-maps of influent, Eff-1, Eff-2, Eff-3, Eff-4, respectively, and (f) and (g) the extracted chromatograms at Em 320 nm and Em 420 nm, respectively.                               | Page S25-S26  |
| Figure S9. H/C versus mass and O/C versus mass of DOM samples. (a) and (b) Influent DOM, (c) and (d) Eff-1 DOM, (e) and (f) Eff-2 DOM, (g) and (h) Eff-3 DOM, and (i) and (j) Eff-4 DOM.                                                                                                                                           | Page S27-S28  |
| Figure S10. The synchronous plots of generated by applying 2D-COS on the O/C of CHO compounds. The correlation was based on the presence/absence of each individual formula as DOM passed through the 4-stage plug-flow bioreactor. Red color indicates a positive correlation, while blue color indicates a negative correlation. | Page S29      |
| Figure S11. van-Krevelen diagrams for labile DOM molecules. (a) Labile molecules in influent, and (b) semilabile molecules in influent.                                                                                                                                                                                            | Page S30      |
| Figure S12. van-Krevelen diagram for nitrogen-containing molecules (CHON and CHONS) in different DOM bioreactivity classification.                                                                                                                                                                                                 | Page S31      |
| Figure S13. Heat map of microbial groups at the genus level at 10 cm depth of each stage of the bioreactor.                                                                                                                                                                                                                        | Page S32      |
| Figure S14. Principal coordinate analysis of microbial structures in the 4-stage plug-flow bioreactor.                                                                                                                                                                                                                             | Page S33      |
| Figure S15. A succinct synthesizing statement of the multiple analytical tools used in this study.                                                                                                                                                                                                                                 | Pages S34-S35 |

## Materials and methods

### *Bioreactor Set-up and Operation*

The laboratory 4-stage plug-flow bioreactor was built following the recommendations of Søndergaard and Worm<sup>1</sup> for the measurement of bioavailable dissolved organic carbon (BDOC) in lake water (Figure S2). Similar bioreactors have been used for BDOC investigation in drinking water, streamwater, and seawater.<sup>2-5</sup>

The bioreactor consisted of 4 darkened glass reactors with various size ( $\Phi 3.78 \times 40$ ,  $7.32 \times 1.68$ ,  $8.01 \times 2.02$ , and  $10.14 \times 4.03$  cm, respectively). These reactors were filled with porous glass beads that had a large ratio of surface area to volume. The reactors and glass beads were both precombusted ( $450\text{ }^{\circ}\text{C}$ , 4 h) to remove organic matter. Then the 4 reactors were linked with sterilized tubes, and peristaltic pumps were also connected to provide a constant flow rate of  $0.5\text{ mL min}^{-1}$ . The hydraulic retention times of the 4 reactors were adjusted to 4, 20, 24, and 48 h, respectively. Additionally, an air pump was used to give sufficient sterilized air (filtered by  $0.22\text{ }\mu\text{m}$ ) for the growth of microorganisms.

To enrich the microorganism community adhered on carriers, the bioreactor was initially incubated with Taihu lake water (filtered by  $2.7\text{ }\mu\text{m}$  precombusted Whatman GF/D glass fiber membrane) that contained considerable number of local bacteria. DOC removal in the cultivation was shown in Figure S3. The biodegradation capacity of bioreactor increased with time at the initial cultivation, while the decrease of DOM gradually became stable and effective after 8 months. This incubation time was longer than previous researches,<sup>2,3,5</sup> mainly due to the higher DOC concentrations in CyanoHAB lake water than in drinking water, streamwater and seawater. Moreover, the longer flowing distance of the 4-stage plug-flow bioreactor as compared with the

single-stage bioreactor also resulted in the longer cultivation time. Triplicate samples were collected from the effluent of each reactor (Eff-1, Eff-2, Eff-3, and Eff-4, respectively) for DOM analysis. The interval between each sampling was 4 d.

### ***Batch Bioassays***

To verify system-specificity and biodegradation capacity of the 4-stage plug-flow bioreactor, batch bioassays were conducted as follows: triplicates of influent, Eff-1, Eff-2, Eff-3, and Eff-4 samples were inoculated with 5% volume of a local bacteria inoculum. Water for the inoculum was collected at the same site in Meiliang Bay and filtered through 1.2  $\mu\text{m}$  precombusted Whatman GF/D glass fiber membrane to remove grazers, phytoplankton, zooplankton and detritus. Once again, the filtrate was passed through 0.2  $\mu\text{m}$  (PTFE) Teflon filters to retain bacterial cells. Subsequently, the Teflon filters was washed in sterile ASM-1/10 medium, which was then used as the inoculum.<sup>6</sup> Glass bioassays bottles were kept in the dark at 25 °C and sampled on the 0 ( $d_0$ ), 7<sup>th</sup> ( $d_7$ ), and 56<sup>th</sup> ( $d_{56}$ ) day, respectively, for DOC measurement.

### ***Chromophoric DOM Measurement***

Absorption spectra were obtained between 200 and 800 nm at 1 nm intervals, using a UV–Vis spectrophotometer (Shimadzu, UV-2550PC) with matching 50 mm quartz cells. The slit width was 1 nm, and the wavelength scan rate was 210 nm/min. Milli-Q water was used in the reference cell. Absorbance measurements at each wavelength ( $\lambda$ ) were baseline corrected by subtracting the absorbance at 700 nm. Napierian absorption coefficients ( $a_\lambda$ ) was calculated by multiplying the corrected absorbance reading by 2.303/ $r$ , where  $r$  is the cuvette path length in meters. Concentration

of chromophoric DOM is expressed as absorption coefficient ( $\text{m}^{-1}$ ) at 254 nm ( $a_{254}$ ). Spectral slope ratio ( $S_R$ ) was defined as the ratio of the spectral slopes ( $\text{nm}^{-1}$ ) between  $a_{275}$  and  $a_{295}$  ( $S_{275-295}$ ) and between  $a_{350}$  and  $a_{400}$  ( $S_{350-400}$ ).<sup>7</sup> Specific UV absorbance ( $\text{SUVA}_{254}$ ), a proxy for aromaticity, was calculated by dividing the decadic absorption coefficient 254 by DOC in  $\text{mg C L}^{-1}$ .<sup>8</sup> The first and second derivative absorption spectra were informative of DOM optical properties and were determined by linear regression over sliding 21 nm intervals.<sup>9</sup>

#### ***Fluorescent DOM Measurement***

Emission-excitation matrix (EEM) spectra of water samples were measured using a Hitachi F-7000 fluorescence spectrometer (Hitachi High Technologies, Tokyo, Japan). The scan mode was 700–voltage xenon lamp and the spectra was collected with scanning emission (Em) from 250 to 550 nm at 1 nm intervals by varying the excitation (Ex) wavelength from 200 to 450 nm at intervals of 5 nm. The scan speed was set as  $2400 \text{ nm min}^{-1}$  with Ex and Em slit bandwidths of 5 nm. The blank scans were recorded with Milli-Q water. The collected EEM spectra were corrected for water Raman scatter peaks, inner-filter effects and Rayleigh scattering effects according to previous methods.<sup>10</sup> Daily lamp variations were eliminated by normalizing the corrected and trimmed EEMs to Raman (275 nm) units ( $\text{RU}_{275}$ ). Humification index (HIX) was determined as the ratio of emission scanning areas at the wavelength range of 300–345 nm to 435–480 nm with an excitation wavelength of 254 nm.<sup>11</sup>

Fluorescent DOM (FDOM) components were further identified using a parallel factor analysis (PARAFAC), which separates a data set of EEMs into mathematically and chemically independent components (each representing a single fluorophore or a group of strongly covarying fluorophores).

91 These components were multiplied by their excitation and emission spectra, representing either pure  
92 or combined spectra. PARAFAC modelling was performed using the drEEM toolbox (ver. 0.2.0) for  
93 MATLAB (R2012a).<sup>12</sup> A 3-component model was well validated using an extended method of split  
94 half analysis, which was developed to assemble 6 different dataset “halves” and produce 3 validation  
95 tests “S<sub>4</sub>C<sub>6</sub>T<sub>3</sub>” (Splits-4, Combinations-6, Tests-3). The number of components was determined by  
96 comparing the residuals from models with gradually increased number of components. To quantify  
97 and compare the changes in FDOM components, the concentration of each component was  
98 estimated as their maximum fluorescent intensity ( $F_{\max}$ ) in the model.

#### 100 ***HPLC-EEM***

101 An Agilent 1200 LC System equipped with fluorescence detector was used in this study. HPLC  
102 (Agilent 1200 series) equipped with a reverse phase C18 column (4.6 mm × 150 mm, 5 μm) was  
103 applied. The mixture of ammonium acetate (10 mM) and acetonitrile were used as the mobile phase  
104 with a flow rate of 1 mL min<sup>-1</sup>.<sup>13</sup> The gradient elution method is shown in Table S1. Based on the  
105 results of EEM, the scan mode was set as Table S2 to obtain the hydrophobicity-distinguished  
106 components of FDOM. In RP-HPLC system, the relatively hydrophilic components are generally  
107 eluted in shorter retention time, whereas those with longer retention times are hydrophobic.

#### 109 ***Molecular Characterization of DOM***

110 Owing to the ESI-FTICR-MS analysis requires a low salt content, the DOM was isolated using  
111 solid phase extraction (SPE). The 5 g Bond Elut PPL SPE cartridges (Agilent Technologies) was  
112 used and preactivated with LC-MS grade methanol and water. Water samples were adjusted to pH

2 and loaded onto the conditioned PPL SPE cartridges. All DOM loadings were less than the 2 mM C L<sup>-1</sup> recommend threshold to avoid breakthrough.<sup>14</sup> Salts in the samples were initially eluted by 0.01 M trace metal grade HCl (Fisher Scientific), followed by drying with purity N<sub>2</sub>, and then methanol was added to elute the DOM. Ultrapure water was used as blank sample to check for potential contamination. Mean recovery of carbon by the PPL solid phase was similar between DOM sources (65 ± 9%).

The PPL extracted DOM in methanol was diluted by 2 with ultrapure methanol plus 0.1% ammonium hydroxide (pH 8). Additionally, SPE samples were diluted to less than 50 mg C L<sup>-1</sup> to minimize charge competition during ionization. DOM was continuously infused into an Apollo II ESI Ion source in negative mode of a Bruker Daltonics 7 T Apex Qe FTICR-MS. The injection rate was set at 120 µL h<sup>-1</sup>. Accumulation of ions in the hexapole ranged from 0.4 to 3 s before being transferred to the ICR cell, where 300 scans, collected with a 4 MWord time domain, were coadded for each sample. The summed free induction decay signal was zero-filled once and Sine-Bell apodized prior to fast Fourier transformation and magnitude calculation using Bruker Daltonics Data Analysis software. Similarly, a 50/50 (v/v) MeOH: H<sub>2</sub>O blank spectrum was collected to test for contamination.

All m/z lists ranged from 150 m/z to 750 m/z were considered using a signal to noise ratio ≥ 4 and were internally calibrated using data lists of fatty acids and a list of peaks common to all samples.<sup>15</sup> Those peaks detected in the blank spectrum were discarded prior to formulas assignments. Peak detection limits were standardized between samples by adjusting the dynamic range of each sample to that of the sample with the lowest dynamic range (dynamic range = average of the largest 20% of peaks divided by the signal to noise threshold intensity; standardized detection limit =



average of largest 20% of peaks within a sample divided by the lowest dynamic range within the sample set).<sup>16</sup> Peaks below the standardized detection limit were deleted to prevent false negatives for the occurrence of a peak within samples with low dynamic range.

Molecular formulae assignment was performed based on exact masses following the criteria described in Stubbins et al.<sup>17</sup> A molecular formula calculator (Molecular Formula Calc v.1.0 ©NHMFL, 1998) generated formulas using C, H, O, N, and S. The mass accuracy threshold was  $\leq \pm 1$  ppm. Molecular formulae assignment was built on the modified criteria that was more proper for DOM from cyanobacteria<sup>6</sup>. Formulas containing N<sub>2</sub>S<sub>2</sub> were removed out from the assignments.

Standardized peak intensities ( $z$ ) of formulas within a sample were calculated following:

$$z = \frac{x - \mu}{\sigma} \quad (1)$$

where  $x$  is the measured peak intensity,  $\mu$  is mean peak intensity, and  $\sigma$  is the standard deviation in peak intensity within the sample.

On the bases of presence or absence of the heteroatoms N, P and S in assigned formulae, the molecules were grouped into 4 elemental classes: CHO, CHON, CHOS, and CHONS. Formulae were also grouped into several compound classes based on modified aromaticity index ( $AI_{mod}$ ), the ratios of H/C and O/C, and the number of N as follows: condensed aromatics ( $AI_{mod} > 0.67$ ), aromatics ( $0.5 < AI_{mod} \leq 0.67$ ), highly unsaturated, high oxygen ( $AI_{mod} < 0.5$ ,  $O/C < 0.5$ , and  $H/C < 1.5$ ), highly unsaturated, low oxygen ( $AI_{mod} < 0.5$ ,  $0.5 \leq O/C < 0.9$ , and  $H/C < 1.5$ ), aliphatics ( $N = 0$ ,  $O/C < 0.9$ , and  $1.5 \leq H/C \leq 2$ ), peptides ( $N > 0$ ,  $O/C < 0.9$ , and  $1.5 \leq H/C \leq 2$ ), saturated fatty acids ( $O/C < 0.9$  and  $H/C > 2$ ), and sugars ( $O/C \geq 0.9$ ).<sup>18</sup> The computed averages values for  $m/z$ ,  $AI_{mod}$ , H, C, N, O, S, and the H/C and O/C ratios were based upon intensity-weighted averages of mass peaks with assigned molecular formulas.

### *Microbial Community Analysis*

Briefly, the glass beads in the bottom 10 cm of each reactor of the bioreactor were extracted and homogenized, respectively, in sterile environment. Then, 8 g of the extracted glass beads were added in sterile polypropylene tubes with 15 mL autoclaved 0.1% tetrasodium pyrophosphate. Tubes were mixed 40 s and sonicated for 5 min with a Branson tabletop ultrasonic cleaner model 1501 (40 kHz, 70 W, Branson Ultrasonic Corporation, Danbury, CT) to disrupt biofilms and lyse cells. Finally, solutions were filtered by 0.22 µm sterilized polycarbonate filters to obtain the microorganisms and stored in -70 °C before further analysis.

DNA was extracted in duplicate for each sample using a PowerSoil kit (MO BIO Laboratories, Carlsbad, CA) according to the manufacturer's directions, and the DNA solutions (approximately 100 µL for each extraction) were pooled to reduce sample variability. 16S rRNA was partially amplified using the forward primer 515F (5'-GTGCCAGCMGCCGCGG-3') and the reverse primer 907R (5'-CCGTCAATTCCTTTGAGTTT-3').<sup>19</sup> The PCR reaction program was as follows: 0.2 µM of each primer and 0.2 mM dNTP, and 1.5 mM MgCl<sub>2</sub> and 0.2 units of Taq polymerase. PCR amplification (initial denaturation at 95 °C for 2 min, and 25 cycles at 95 °C for 30 s, 55 °C for 30 s and 72 °C for 30 s, and a final extension at 72 °C for 5 min) and gel purification procedures were conducted and processed by the Meiji Biotechnology Company (Shanghai, China) for high-throughput DNA sequencing with the Illumina MiSeq System (Illumina, San Diego, U.S.A.).<sup>19</sup>

All 16S rRNA sequence reads were filtered, denoised and processed by using Trimmomatic (ver. 0.36) (<http://www.usadellab.org/cms/?page=trimmomatic>) and FLASH (<https://ccb.jhu.edu/software/FLASH/>) under the following rules: (1) remove the bases with the

trailing quality score being under 20, scan the read with a 50-base wide sliding window, do cutting operations when the average quality score per base drops below 20, and drop the reads below 50 bases long, (2) merge the reads in pairs into a new one on the basis of their overlap (the minimum length overlapped was 10 bases), (3) remove the merged reads that the mismatch ratio in overlapping regions larger than 0.2, and (4) remove the reads with the mismatch numbers of primer larger than 2. The after quality control were analyzed through QIIME (ver. 1.6.0).<sup>20</sup> Sequences with similarities > 97% were clustered into one operational taxonomic unit (OTU) with Usearch (ver. 7.1) (<http://drive5.com/uparse>). OUT representative sequences were aligned against the Greengenes (Release 13.5 <http://greengenes.secondgenome.com/>), and chimeric sequences were identified using Mothur (ver. 1.30).<sup>21 22</sup> To compare and perform statistics across samples, the numbers of sequences in each sample were first normalized down to the number in the sample with the fewest sequences. Alpha diversity estimates (Shannon) and Beta diversity were determined in the QIIME program. The raw data has been submitted to NCBI Sequence Read Archive (SRA) with accession number of SRR5252713, SRR5252714, SRR5252715 and SRR5252716.

## 2D-COS Analysis

The 2D-COS was applied depending on the method of Noda and Ozaki.<sup>23</sup> To obtain the variation of hydrophobicity-distinguished FDOM fractions with HRTs, 2D-COS was performed on the HPLC-EEM spectral data. Prior to 2D correlation spectra analysis, the HPLC-EEM data were normalized to avoid dimension difference, and then the 2D correlation spectra analysis was performed using 2D Shige ver. 1.3 software (Kwansei-Gakuin University, Japan). A set of HRTs-dependent HPLC-EEM data was obtained, and 2D correlation spectra were produced based on the HPLC-EEM data using the HRTs as the external perturbation. The 2D correlation spectra are comprised of synchronous and asynchronous map. In the synchronous 2D correlation spectra, the auto-peak centered at diagonal positions represents the overall extent of intensity variation of a specific spectral variable over the interval. The positive cross-peak at the wavelength pair of  $\lambda_1/\lambda_2$  suggests the possible existence of a coupled or related origin of the spectral intensity variations measured at  $\lambda_1$  and  $\lambda_2$ , while a negative cross-peak at the wavelength pair of  $\lambda_1/\lambda_2$  suggests that the change occurring at  $\lambda_1$  and  $\lambda_2$  was asynchronous or inverse.

As to the asynchronous 2D correlation spectra, if the change of  $\lambda_1$  and  $\lambda_2$  was concurrent, the positive cross-peak at the wavelength pair of  $\lambda_1/\lambda_2$  suggests that the change occurring at the wavelength  $\lambda_1$  is quicker than that occurring at the wavelength  $\lambda_2$ , whereas a negative cross-peak at the wavelength pair of  $\lambda_1/\lambda_2$  suggests that the change occurring at the wavelength  $\lambda_1$  is slower than that occurring at the wavelength  $\lambda_2$ . If the change of  $\lambda_1$  and  $\lambda_2$  was asynchronous or inverse, the same conditions of peaks indicate the opposite direction of the change.<sup>24</sup>

215 **Table S1.** HPLC Gradient Elution Scheme

| Time (min) | Acetonitrile (%) | Ammonium acetate (%) | Flow rate (mL min <sup>-1</sup> ) |
|------------|------------------|----------------------|-----------------------------------|
| 0.00       | 20.0             | 80.0                 | 1.0                               |
| 4.00       | 70.0             | 30.0                 | 1.0                               |
| 5.00       | 90.0             | 10.0                 | 1.0                               |
| 10.00      | 95.0             | 5.0                  | 1.0                               |
| 15.00      | 95.0             | 5.0                  | 1.0                               |

216

217

**Table S2.** FLD Parameters Setup

| Scan mode             | Ex (nm) | Em (nm) |
|-----------------------|---------|---------|
| Multi-excitation scan | 230-290 | 324     |
|                       | 220-380 | 425     |
| Multi-emission scan   | 235     | 300-500 |

218

219 **Table S3.** Changes of DOC Concentration in the 4-Stage Plug-Flow Bioreactor and Batch  
 220 Inoculation (mg L<sup>-1</sup>)

|          | 4-stage plug-flow bioreactor | Bioassay           |                     |
|----------|------------------------------|--------------------|---------------------|
|          |                              | 7 days inoculation | 56 days inoculation |
| Influent | 35.77 ± 6.19                 | 19.61 ± 3.68       | 11.74 ± 0.92        |
| Eff-1    | 21.60 ± 0.88                 | 15.07 ± 1.29       | 9.94 ± 1.76         |
| Eff-2    | 10.68 ± 0.34                 | 9.51 ± 1.33        | 8.87 ± 1.25         |
| Eff-3    | 8.62 ± 1.35                  | 9.20 ± 0.38        | 8.95 ± 0.11         |
| Eff-4    | 7.44 ± 0.51                  | 9.18 ± 0.43        | 8.64 ± 0.92         |

221

**Table S4.** DOM Molecular Characterization after Having Passed through the 4-Stage Plug-Flow Bioreactor

|                                               | Influent | Eff-1 | Eff-2 | Eff-3 | Eff-4 |
|-----------------------------------------------|----------|-------|-------|-------|-------|
| Total number                                  | 1065     | 1011  | 1032  | 917   | 857   |
| $m/z_w^a$                                     | 334      | 478   | 373   | 385   | 396   |
| $AI_{mod}^a$                                  | 0.12     | 0.22  | 0.17  | 0.21  | 0.18  |
| $C_w^a$                                       | 15.32    | 24.40 | 17.82 | 19.16 | 20.46 |
| $H_w^a$                                       | 21.54    | 31.71 | 23.80 | 25.00 | 29.75 |
| $O_w^a$                                       | 6.76     | 6.42  | 6.70  | 6.37  | 6.09  |
| $N_w^a$                                       | 0.78     | 1.46  | 0.81  | 0.86  | 0.73  |
| $S_w^a$                                       | 0.34     | 0.99  | 0.54  | 0.56  | 0.45  |
| $O/C_w^a$                                     | 0.49     | 0.32  | 0.44  | 0.40  | 0.34  |
| $H/C_w^a$                                     | 1.42     | 1.32  | 1.37  | 1.33  | 1.45  |
| $N/C_w^a$                                     | 0.06     | 0.06  | 0.05  | 0.05  | 0.04  |
| $S/C_w^a$                                     | 0.02     | 0.04  | 0.03  | 0.03  | 0.02  |
| %CHO <sup>b</sup>                             | 39%      | 25%   | 41%   | 43%   | 50%   |
| %CHON <sup>b</sup>                            | 34%      | 21%   | 23%   | 24%   | 23%   |
| %CHOS <sup>b</sup>                            | 17%      | 17%   | 16%   | 14%   | 15%   |
| %CHONS <sup>b</sup>                           | 10%      | 36%   | 20%   | 19%   | 12%   |
| %Condensed aromatics <sup>b</sup>             | 5%       | 12%   | 7%    | 9%    | 4%    |
| %Aromatics <sup>b</sup>                       | 6%       | 12%   | 8%    | 10%   | 5%    |
| %Highly unsaturated, low oxygen <sup>b</sup>  | 22%      | 26%   | 21%   | 24%   | 28%   |
| %Highly unsaturated, high oxygen <sup>b</sup> | 27%      | 10%   | 24%   | 22%   | 17%   |
| %Aliphatics <sup>b</sup>                      | 20%      | 13%   | 19%   | 16%   | 26%   |
| %Peptide-like <sup>b</sup>                    | 16%      | 21%   | 18%   | 15%   | 16%   |
| %Saturated fatty acids <sup>b</sup>           | 2%       | 5%    | 2%    | 3%    | 4%    |
| %Sugars <sup>b</sup>                          | 2%       | 1%    | 1%    | 1%    | 0%    |

<sup>a</sup>Intensity-weighted average. <sup>b</sup>The composition is based on the total intensity-weighted proportion of molecules



226 **Table S5.** Molecular Characterization of the Labile DOM, Semilabile DOM, Refractory DOM and  
 227 Bioproducted DOM

|                                               | Labile | Semilabile | Refractory | Bioproducted |
|-----------------------------------------------|--------|------------|------------|--------------|
| $m/z^a$                                       | 377    | 309        | 303        | 479          |
| $AI_{mod}^a$                                  | 0.09   | 0.01       | 0.20       | 0.20         |
| $O/C^a$                                       | 0.46   | 0.57       | 0.50       | 0.27         |
| $H/C^a$                                       | 1.42   | 1.48       | 1.33       | 1.47         |
| $N/C^a$                                       | 0.07   | 0.07       | 0.03       | 0.06         |
| $S/C^a$                                       | 0.03   | 0.03       | 0.01       | 0.04         |
| %CHO <sup>b</sup>                             | 21     | 22         | 65         | 24           |
| %CHON <sup>b</sup>                            | 41     | 49         | 29         | 28           |
| %CHOS <sup>b</sup>                            | 24     | 25         | 6          | 20           |
| %CHONS <sup>b</sup>                           | 14     | 4          | 0          | 28           |
| %Condensed aromatics <sup>b</sup>             | 7      | 2          | 0          | 10           |
| %Aromatics <sup>b</sup>                       | 12     | 5          | 4          | 8            |
| %Highly unsaturated, low oxygen <sup>b</sup>  | 19     | 17         | 28         | 23           |
| %Highly unsaturated, high oxygen <sup>b</sup> | 16     | 28         | 41         | 5            |
| %Aliphatics <sup>b</sup>                      | 17     | 25         | 18         | 22           |
| %Peptide-like <sup>b</sup>                    | 23     | 17         | 9          | 24           |
| %Saturated fatty acids <sup>b</sup>           | 3      | 2          | 0          | 8            |
| %Sugars <sup>b</sup>                          | 3      | 4          | 0          | 0            |

<sup>a</sup>Average values of all molecules. <sup>b</sup>This percentage was calculated based on number of molecules

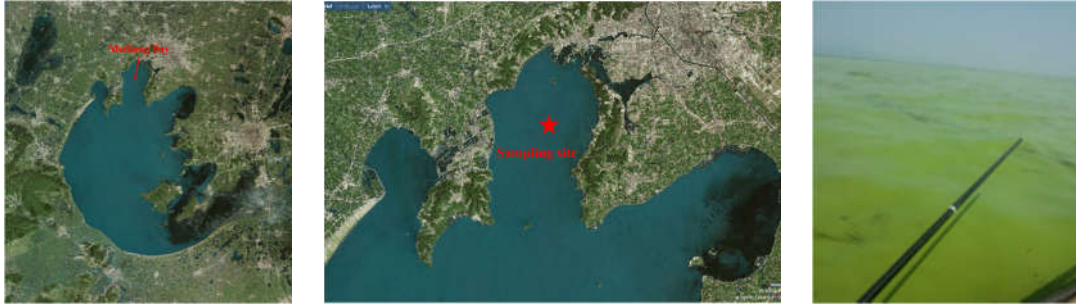

229 **Figure S1.** Location of Meiliang Bay and Taihu sampling site (coordinates: 31°28'46.17"N,

230 120°11'19.70"S).

231

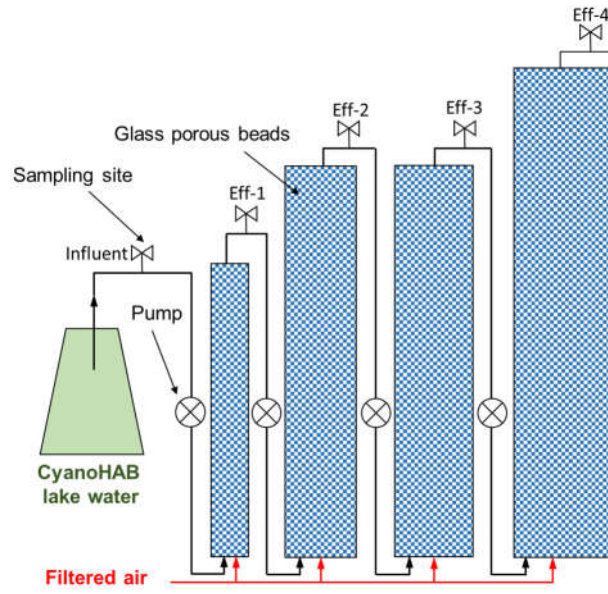

**Figure S2.** Setup and operation schemes of the 4-stage plug-flow bioreactor.

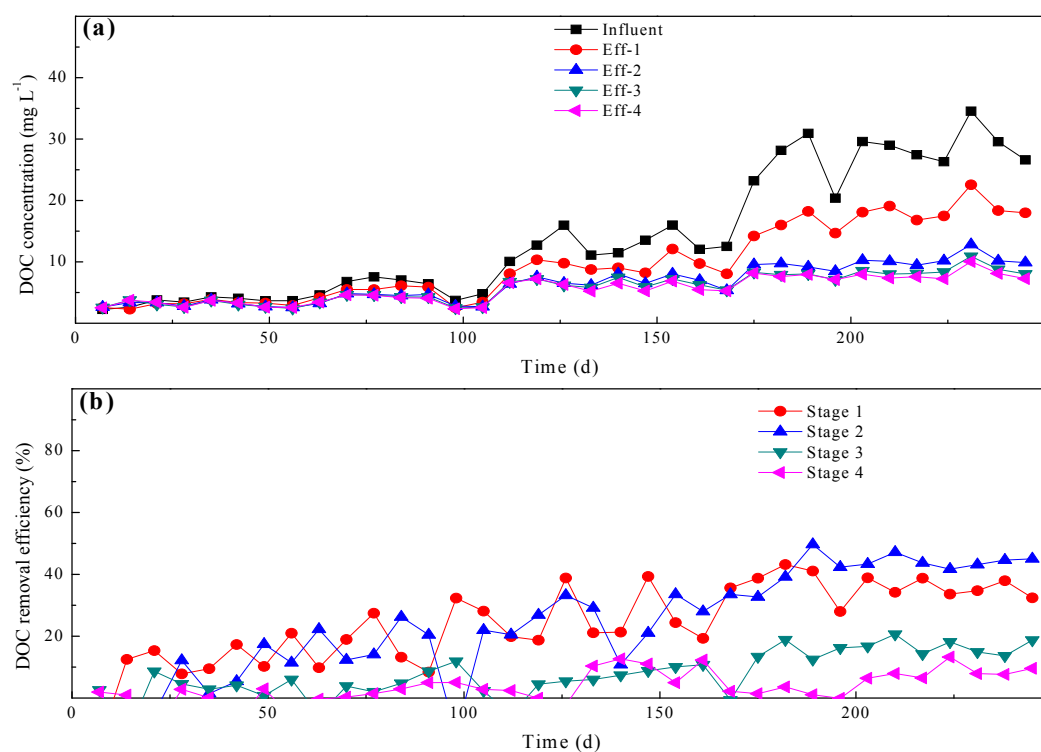

**Figure S3.** Concentrations and removal efficiencies of DOC in the 4-stage plug-flow bioreactor during incubation. (a) DOC concentrations, and (b) DOC removal efficiencies in each stage of the bioreactor.

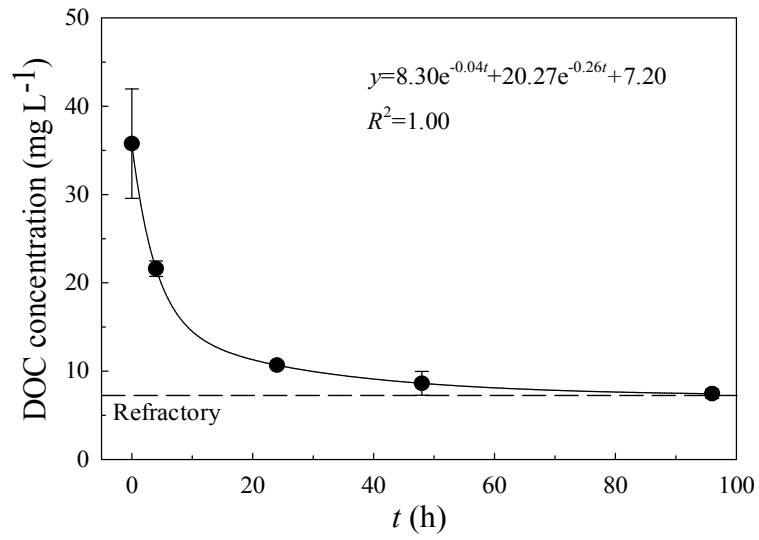

**Figure S4.** *G* model fitting results of DOC concentrations in the 4-stage plug-flow bioreactor. *G* model:  $DOC = C_1e^{-k_1t} + C_2e^{-k_2t} + C_3e^0$ , where  $C_1$ ,  $C_2$  and  $C_3$  were the concentrations of labile DOC, semilabile DOC and refractory DOC, respectively.

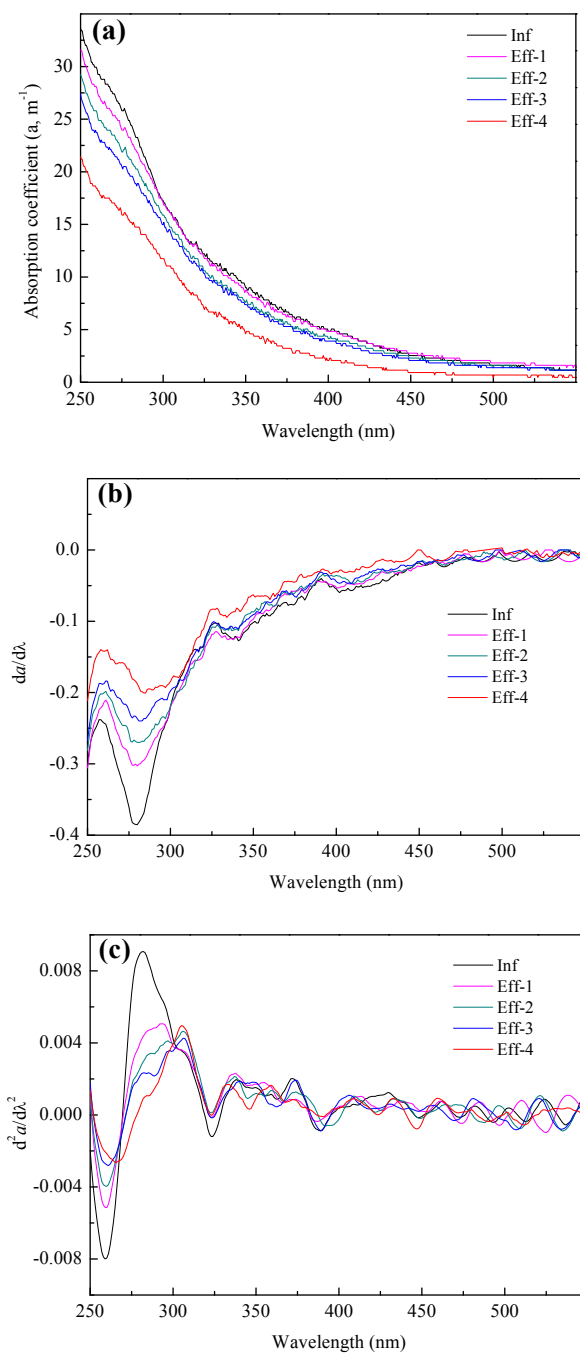

244 **Figure S5.** (a) CDOM absorption coefficient spectra ( $a$ ,  $m^{-1}$ ), (b) first derivative absorption spectra,

245 and (c) second derivative absorption spectra of the DOM as passed through the 4-stage plug-flow

246 bioreactor.

247

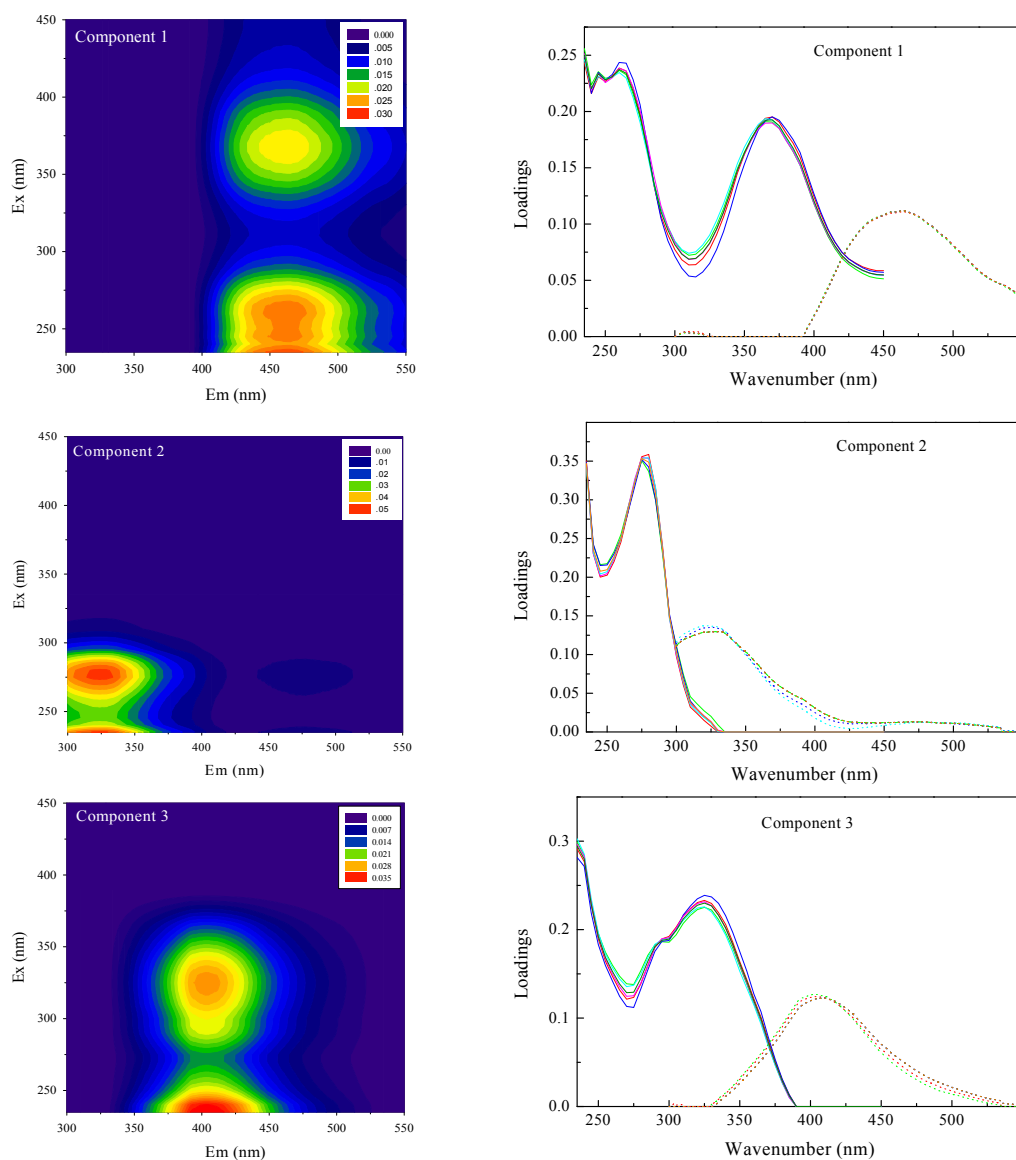

248 **Figure S6.** EEM spectrum of the 4 components identified by the PARAFAC analysis for the DOM  
 249 samples and the highly overlaid excitation and emission spectra estimated using the split-half  
 250 validation procedure.

251

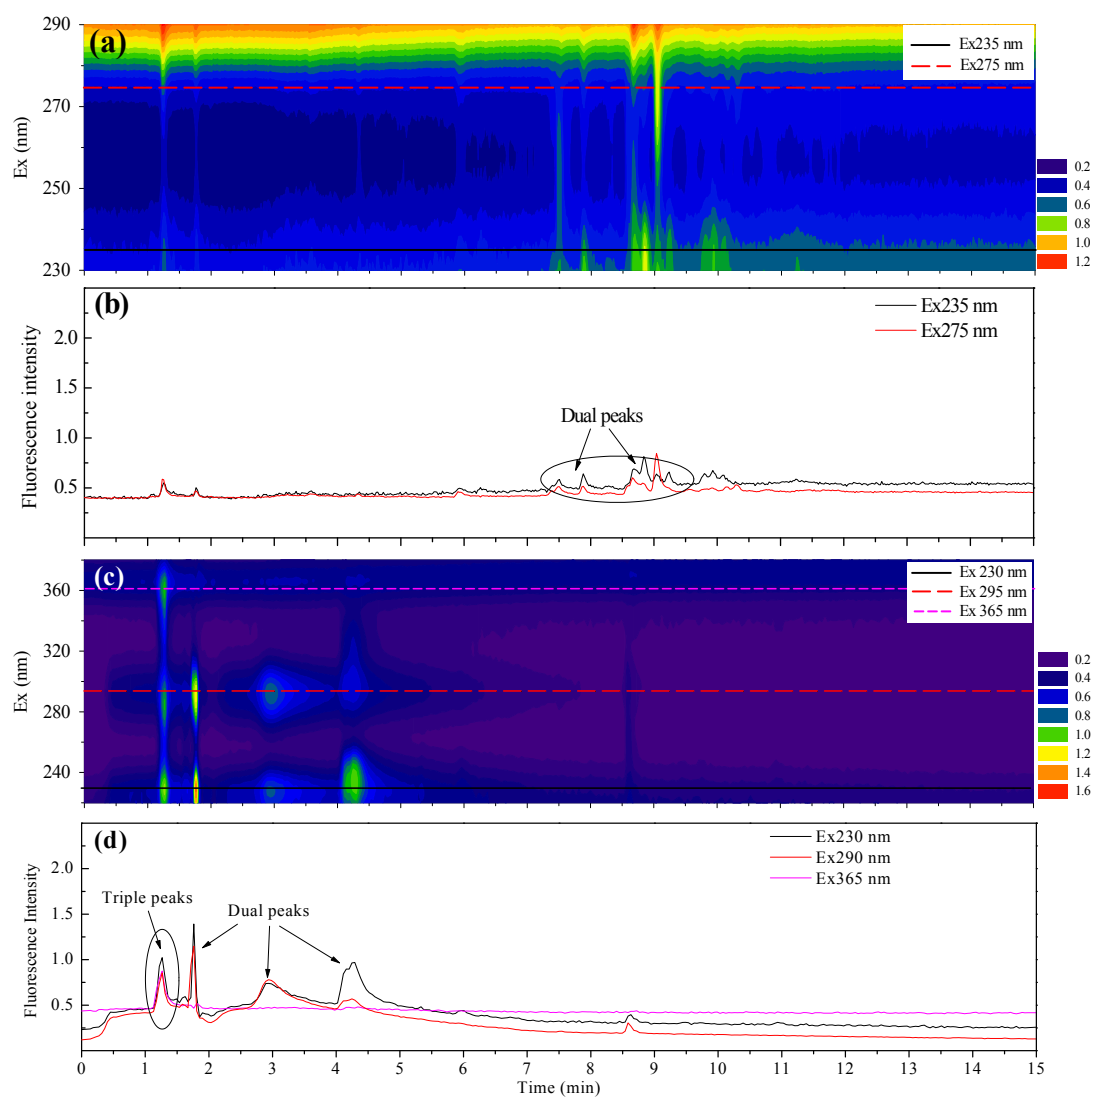

**Figure S7.** HPLC fluorescence Excitation-Time-Maps of CyanoHAB-DOM. (a) and (b) Excitation-Time-Map at Em 324 nm and the extracted chromatograms at Em 235 and 275 nm, respectively, and (c) and (d) Excitation-Time-Map at Em 425 nm and the extracted chromatograms at Em 230, 290 and 365 nm, respectively.



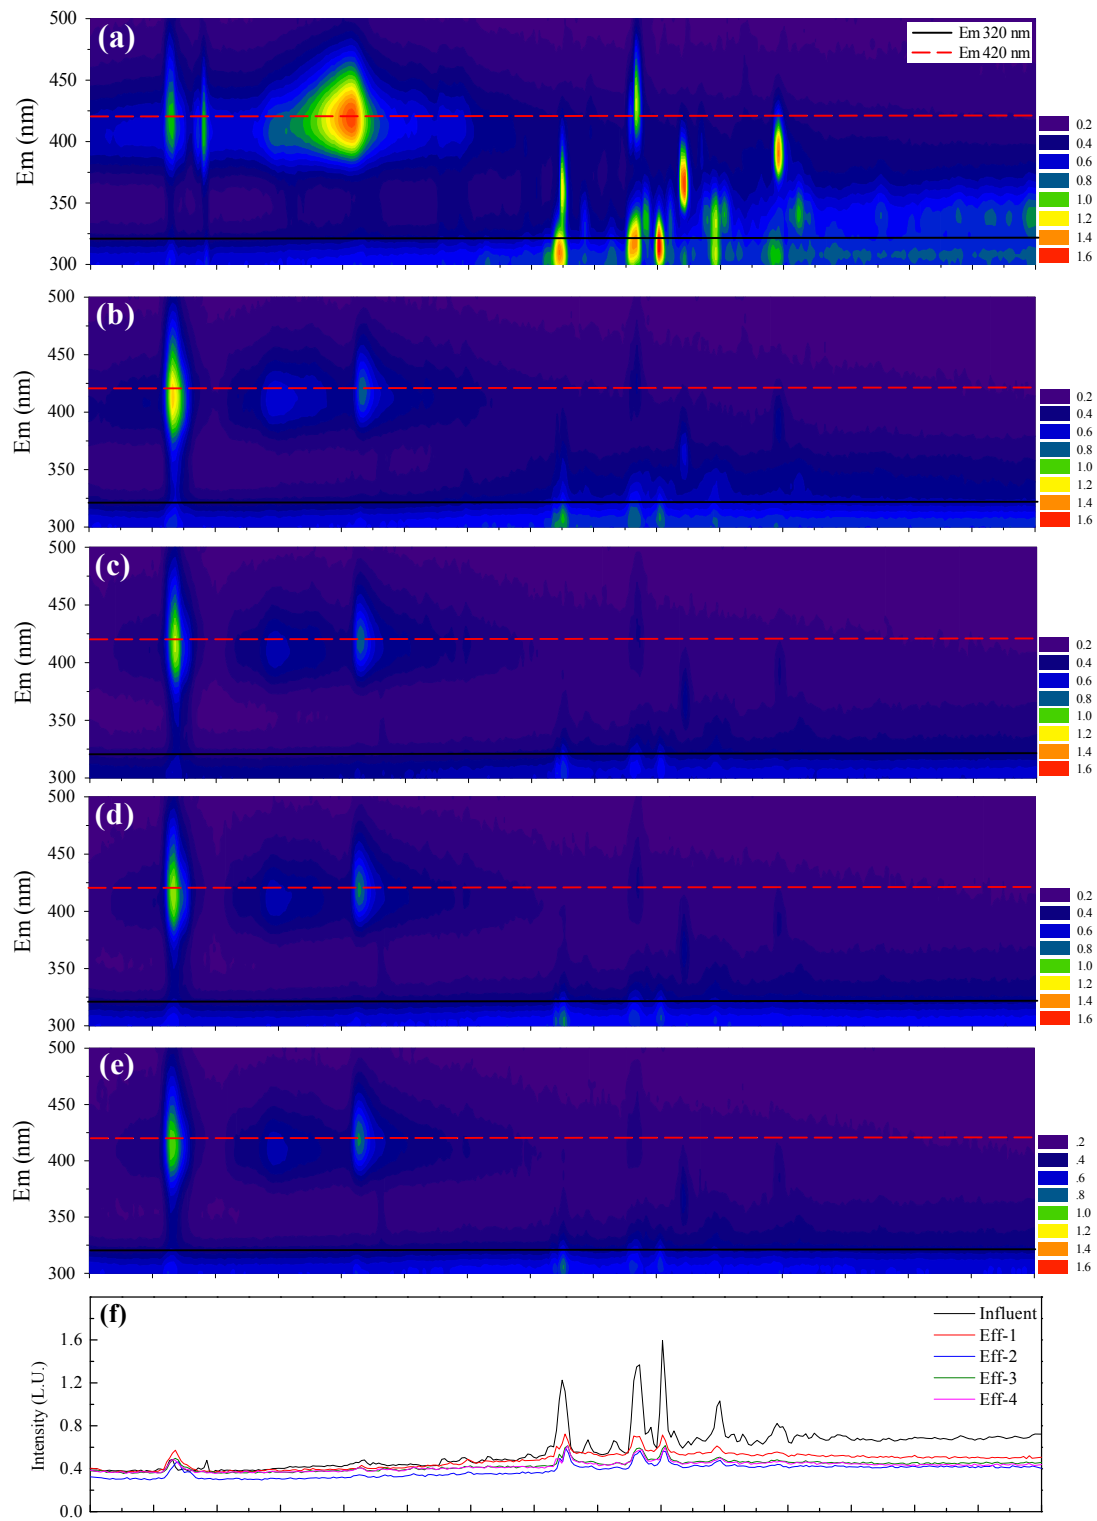

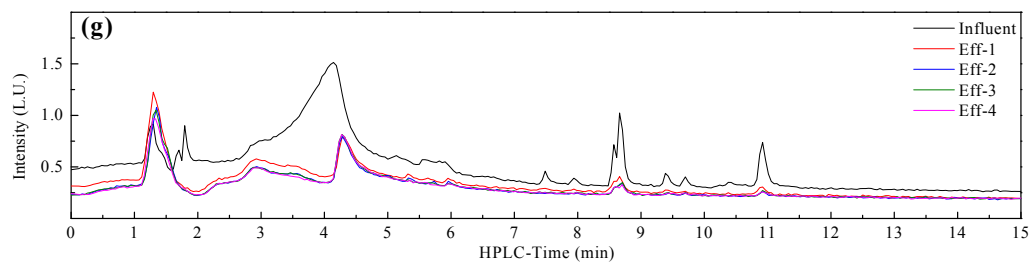

258 **Figure S8.** HPLC fluorescence emission-time-maps at Ex 235 nm for the DOM as passed through  
 259 the 4-stage plug-flow bioreactor. (a)–(e) Emission-time-maps of influent, Eff-1, Eff-2, Eff-3, Eff-4,  
 260 respectively, and (f) and (g) the extracted chromatograms at Em 320 nm and Em 420 nm,  
 261 respectively.

262

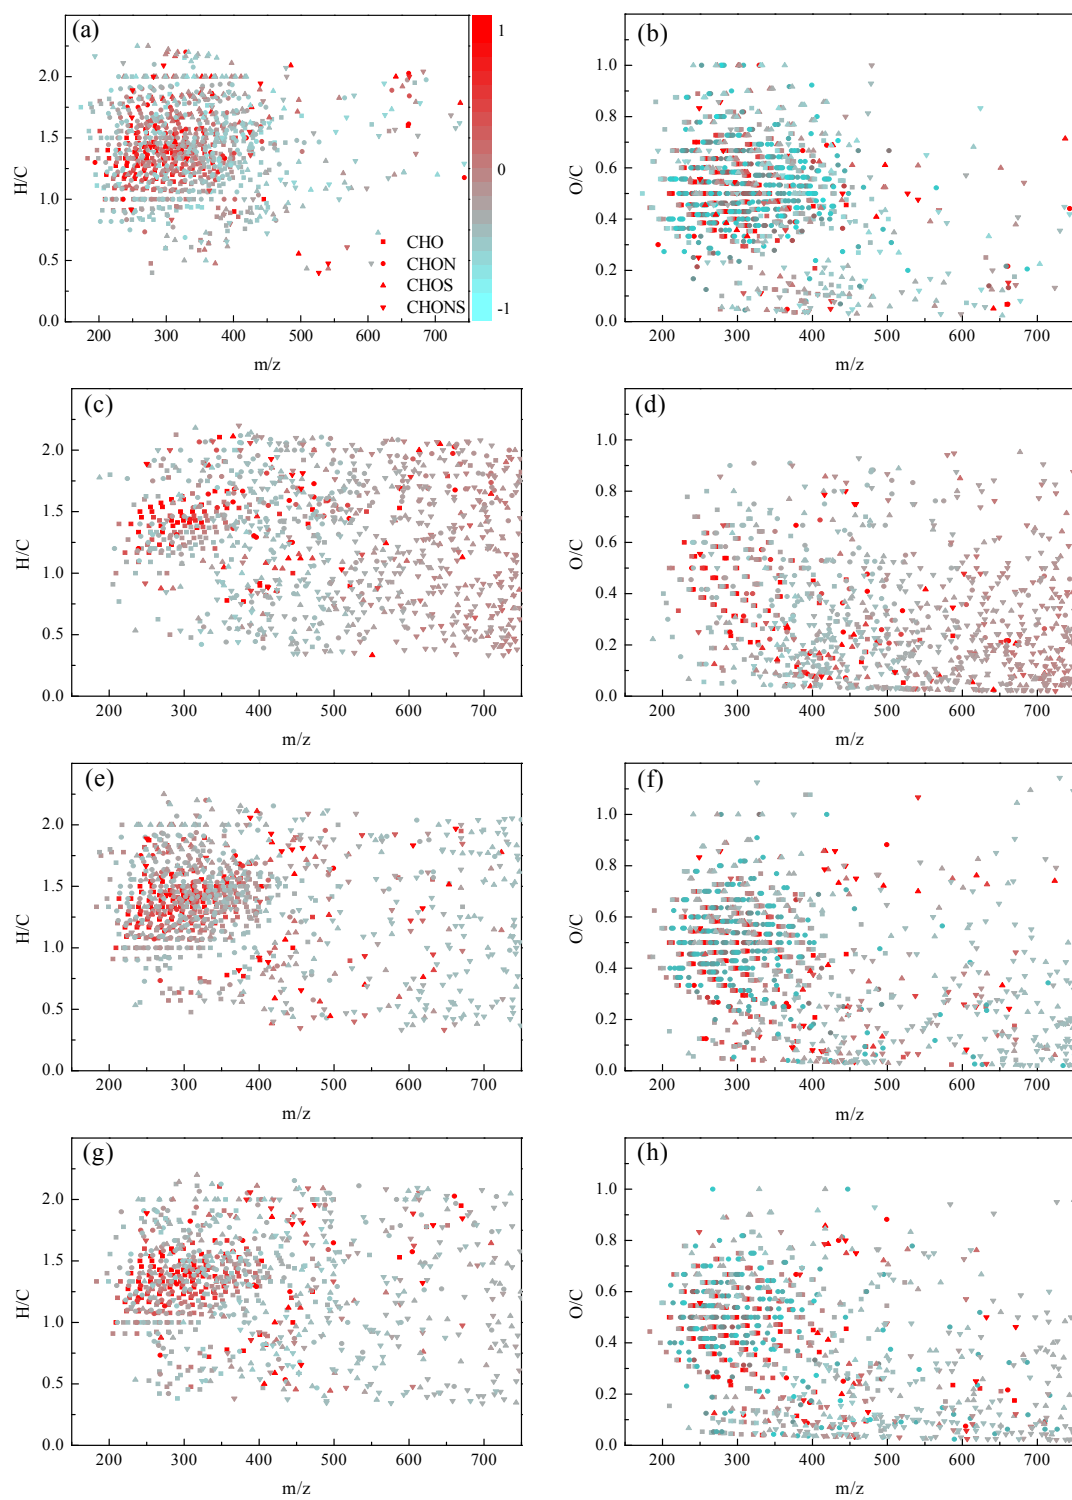

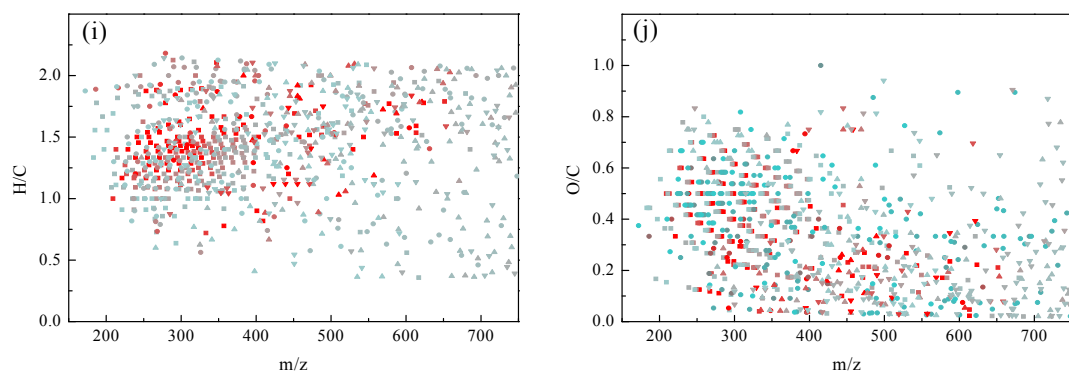

263 **Figure S9.** H/C versus mass and O/C versus mass of DOM samples. (a) and (b) Influent DOM, (c)  
 264 and (d) Eff-1 DOM, (e) and (f) Eff-2 DOM, (g) and (h) Eff-3 DOM, and (i) and (j) Eff-4 DOM.  
 265

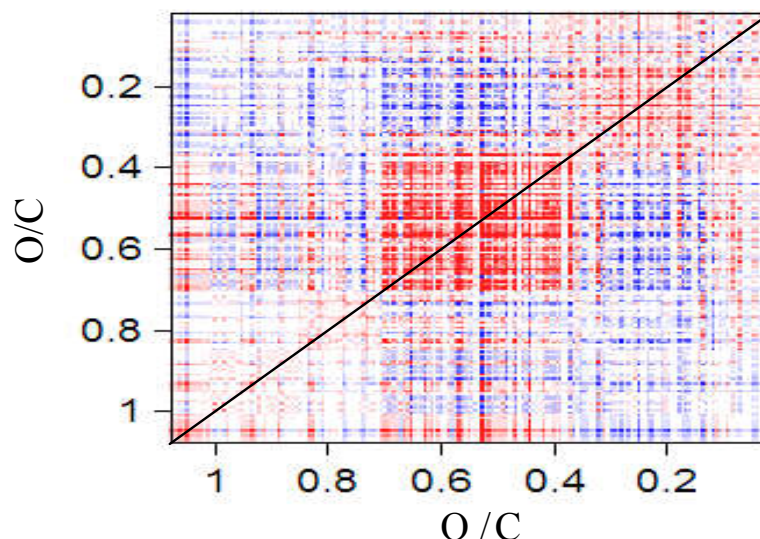

**Figure S10.** The synchronous plots of generated by applying 2D-COS on the O/C of CHO compounds. The correlation was based on the presence/absence of each individual formula as DOM passed through the 4-stage plug-flow bioreactor. Red color indicates a positive correlation, while blue color indicates a negative correlation.

There were three distinct areas with strong signals along the diagonal line. Formulas at high O/C of 0.4–0.7 showed the greatest changes in the number of CHO formulas with biodegradation, followed by formulas with O/C of 0.1–0.4, whereas the formulas at O/C of 0.7–1.1 exhibited the smallest changes. By reexamining the CHO formulas with the O/C of 0.4–0.7, it was clear that the number of formulas in this region decreased as passed through the 4-stage bioreactor. The cross correlation (off-diagonal) signals indicated that the formulas that fell in the region of O/C 0.4–0.7 had positive correlations with formulas at O/C ratios of 0.7–1.1, suggesting that the number of these 2 groups of formulas decreased together. However, formulas with O/C of 0.1–0.4 were negatively correlated with those at 0.4–0.7, implying that new compounds at O/C of 0.1–0.4 were added to the DOM pool as the number of formulas at 0.4–0.7 and 0.7–1.1 decreased with biodegradation. These results confirmed that the formulas with higher O/C ratios were most labile and supposed to be

metabolized quickly, whereas some low oxygenated compounds were produced. Although some observation can be made from the O/C versus mass plots visually, 2D-COS can provide towards insights when trying to identify the different regions with regard to their bioreactivity and those changes in the number of formulas in each region.

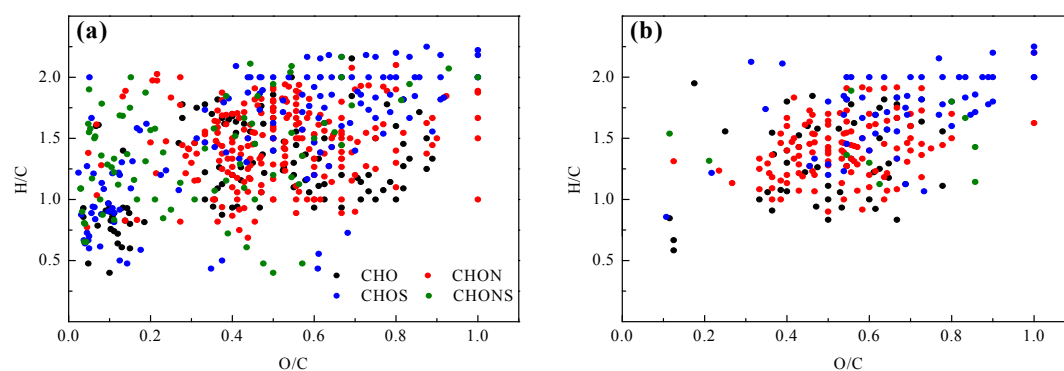

**Figure S11.** van-Krevelen diagrams for labile DOM molecules. (a) Labile molecules in influent, and (b) semilabile molecules in influent.

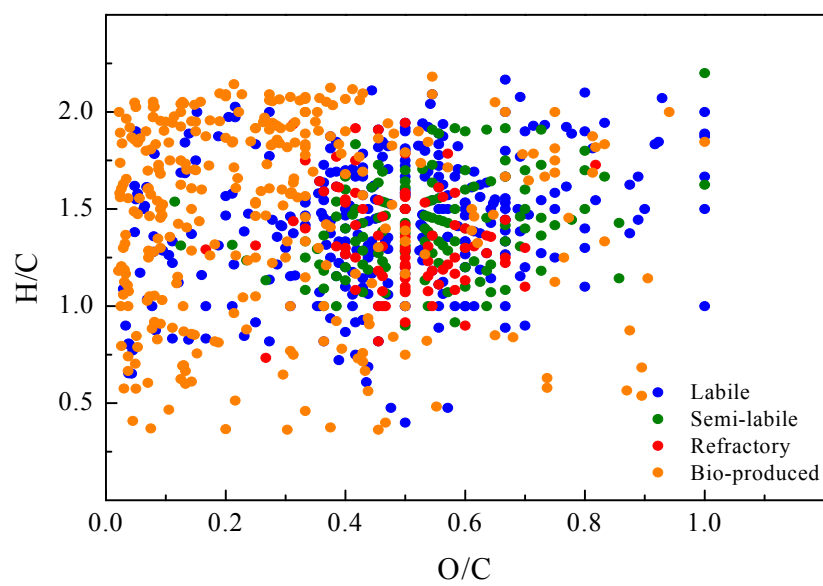

**Figure S12.** van-Krevelen diagram for nitrogen-containing molecules (CHON and CHONS) in different DOM bioreactivity classification.

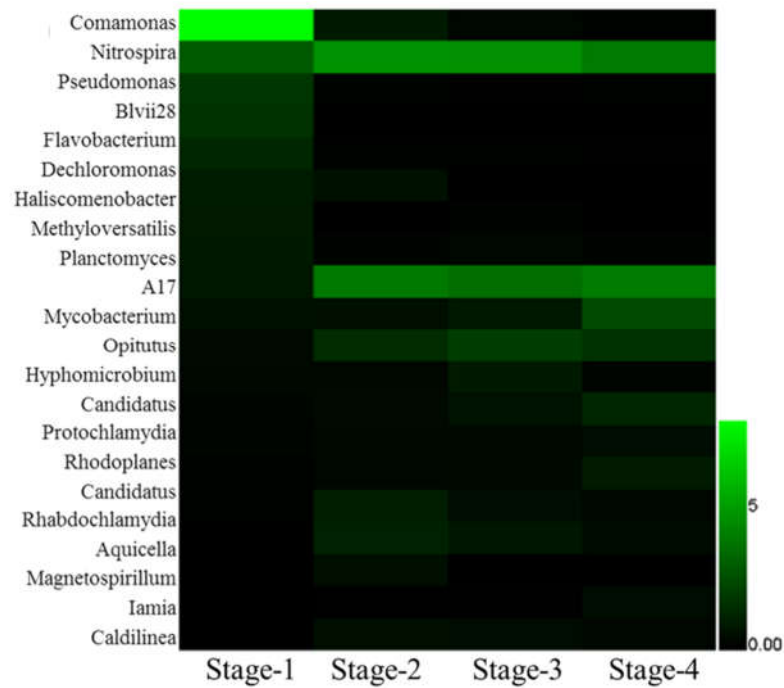

**Figure S13.** Heat map of microbial groups at the genus level at 10 cm depth of each stage of the bioreactor.



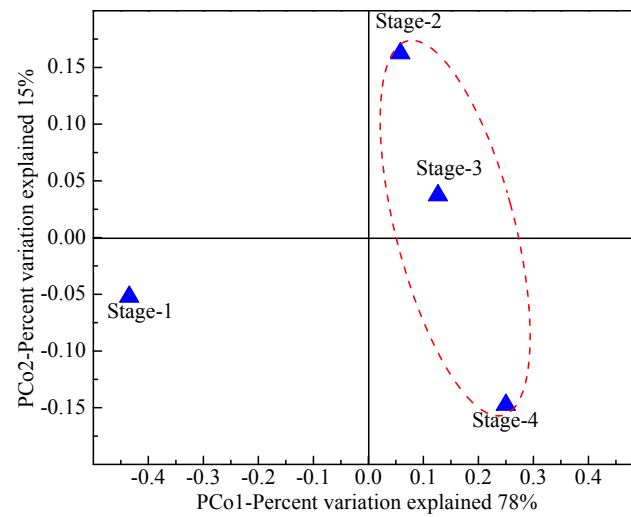

**Figure S14.** Principal coordinate analysis of microbial structures in the 4-stage plug-flow bioreactor.

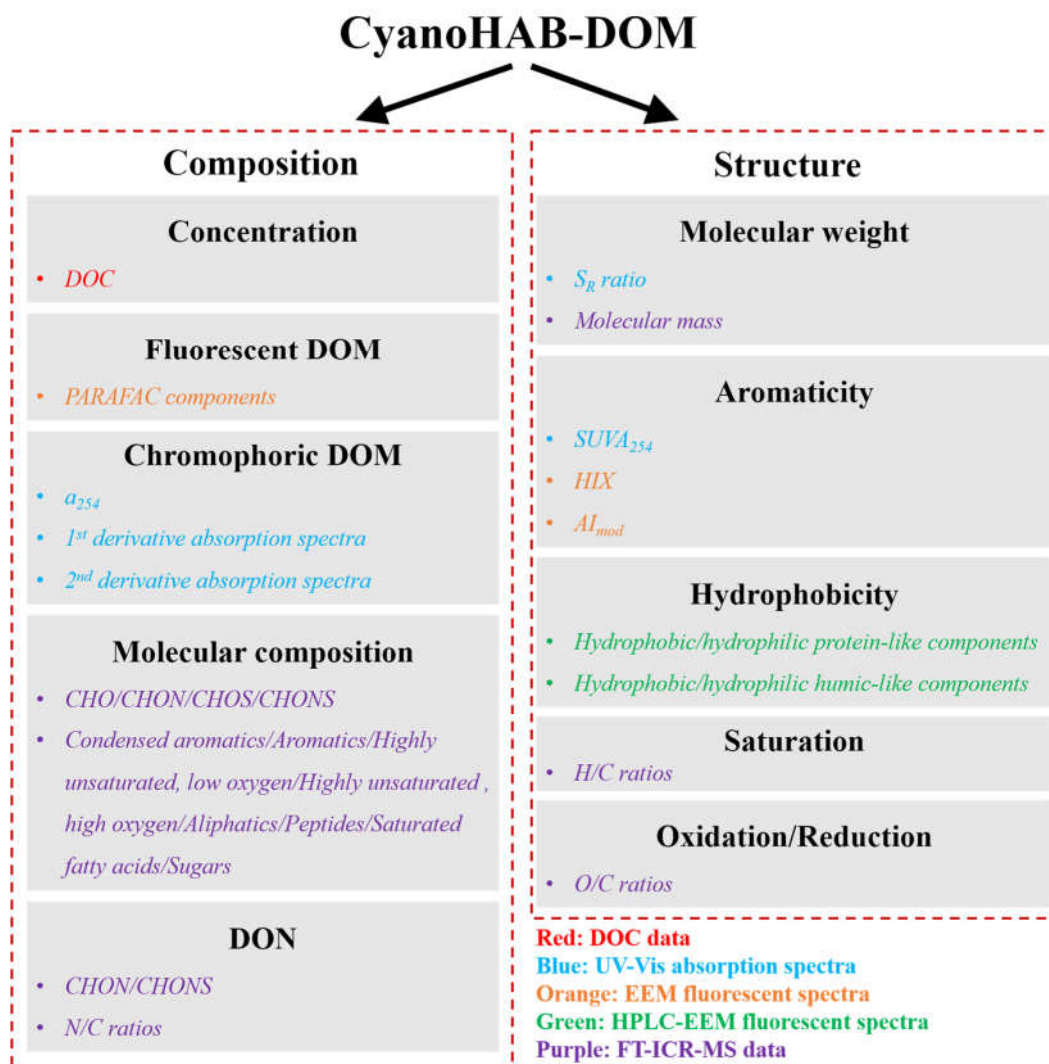

**Figure S15.** A succinct synthesizing statement of the multiple analytical tools used in this study.

Multiple analytical tools including DOC concentration, molecular composition, absorption and fluorescence spectra, and hydrophobicity-distinguished components were used to characterize the temporary evolution in composition and structure of CyanoHAB-DOM in the 4-stage plug-flow bioreactor (Figure S15). Through *G* model fitting, the bulk DOC was separated into labile, semilabile, and refractory fractions. This attenuation profiles provided an excellent way to generally distinguish the DOM compounds with various bioavailability. Concentrations of chromophoric and fluorescent DOM were represented as  $a_{254}$  and  $F_{\max}$  of PARAFAC components, respectively. With the use of FTICR-MS, 4 kinds of molecules, including CHO, CHON, CHOS and CHONS, were

assigned and they were further classified into different compounds, e.g. aromatics, unsaturated compounds, peptides and so on. Additionally, changes in DON were investigated with nitrogen-bearing molecules.

Results also provided information on the structure of CyanoHAB-DOM, including molecular weight, aromaticity, saturation, oxidation/reduction and hydrophobicity. The  $S_R$  ratio and molecular mass ( $m/z$ ) reflected the changes in molecular weight of DOM. The aromaticity of DOM was related to the values of  $SUVA_{254}$ , HIX and  $AI_{mod}$ . H/C and O/C ratios, which were obtained by FTICR-MS, indicated the saturation and oxidation of DOM molecules, respectively. In combination of 2D-COS, HPLC-EEM further revealed the evolution of hydrophobicity-distinguished components in a successive biodegradation. Overall, the multiple analytical data provide a deeper insight on the relationship between the composition and structure of CyanoHAB-DOM and its biodegradation.

## REFERENCES

1. Søndergaard, M.; Worm, J., Measurement of biodegradable dissolved organic carbon (BDOC) in lake water with a bioreactor. *Water Res.* **2001**, *35*, (10), 2505-2513.
2. Ribas, F.; Frias, J.; Lucena, F., A new dynamic method for the rapid-determination of the biodegradable dissolved organic-carbon in drinking-water. *J. Appl. Bacteriol.* **1991**, *71*, (4), 371-378.
3. Kaplan, L. A.; Newbold, J. D., Measurement of streamwater biodegradable dissolved organic carbon with a plug-flow bioreactor. *Water Res.* **1995**, *29*, (12), 2696-2706.
4. Sleighter, R. L.; Cory, R. M.; Kaplan, L. A.; Abdulla, H. A. N.; Hatcher, P. G., A coupled geochemical and biogeochemical approach to characterize the bioreactivity of dissolved organic matter from a headwater stream. *J. Geophys. Res.: Biogeosci.* **2014**, *119*, (8), 1520-1537.
5. De Vittor, C.; Larato, C.; Umani, S. F., The application of a plug-flow reactor to measure the biodegradable dissolved organic carbon (BDOC) in seawater. *Bioresource Technol.* **2009**, *100*, (23), 5721-5728.
6. Bittar, T. B.; Vieira, A. A. H.; Stubbins, A.; Mopper, K., Competition between photochemical and biological degradation of dissolved organic matter from the cyanobacteria *Microcystis aeruginosa*. *Limnol. Oceanogr.* **2015**, *60*, (4), 1172-1194.
7. Helms, J. R.; Stubbins, A.; Ritchie, J. D.; Minor, E. C.; Kieber, D. J.; Mopper, K., Absorption spectral slopes and slope ratios as indicators of molecular weight, source, and photobleaching of chromophoric dissolved organic matter. *Limnol. Oceanogr.* **2008**, *53*, (3), 955-969.
8. Weishaar, J. L.; Aiken, G. R.; Bergamaschi, B. A.; Fram, M. S.; Fujii, R.; Mopper, K., Evaluation of specific ultraviolet absorbance as an indicator of the chemical composition and reactivity of dissolved organic carbon. *Environ. Sci. Technol.* **2003**, *37*, (20), 4702-4708.
9. Loiselle, S. A.; Bracchini, L.; Dattilo, A. M.; Ricci, M.; Tognazzi, A.; Cózar, A.; Rossi, C., The optical characterization of chromophoric dissolved organic matter using wavelength distribution of absorption spectral slopes. *Limnol. Oceanogr.* **2009**, *54*, (2), 590-597.
10. Zhou, Y. Q.; Zhang, Y. L.; Jeppesen, E.; Murphy, K. R.; Shi, K.; Liu, M. L.; Liu, X. H.; Zhu, G. W., Inflow rate-driven changes in the composition and dynamics of chromophoric dissolved organic matter in a large drinking water lake. *Water Res.* **2016**, *100*, 211-221.
11. Huguet, A.; Vacher, L.; Relexans, S.; Saubusse, S.; Froidefond, J. M.; Parlanti, E., Properties of fluorescent dissolved organic matter in the Gironde Estuary. *Org. Geochem.* **2009**, *40*, (6), 706-719.
12. Murphy, K. R.; Stedmon, C. A.; Graeber, D.; Bro, R., Fluorescence spectroscopy and multi-way techniques. PARAFAC. *Anal. Methods* **2013**, *5*, (23), 6557-6566.
13. Li, W. T.; Xu, Z. X.; Li, A. M.; Wu, W.; Zhou, Q.; Wang, J. N., HPLC/HPSEC-FLD with multi-excitation/emission scan for EEM interpretation and dissolved organic matter analysis. *Water Res.* **2013**, *47*, (3), 1246-1256.
14. Dittmar, T.; Koch, B.; Hertkorn, N.; Kattner, G., A simple and efficient method for the solid-phase extraction of dissolved organic matter (SPE-DOM) from seawater. *Limnol. Oceanogr.: Methods* **2008**, *6*, 230-235.
15. Sleighter, R. L.; McKee, G. A.; Liu, Z.; Hatcher, P. G., Naturally present fatty acids as internal calibrants for Fourier transform mass spectra of dissolved organic matter. *Limnol. Oceanogr.: Methods* **2008**, *6*, (6), 246-253.
16. Spencer, R. G. M.; Guo, W. D.; Raymond, P. A.; Dittmar, T.; Hood, E.; Fellman, J.; Stubbins, A., Source and biolability of ancient dissolved organic matter in glacier and lake ecosystems on the Tibetan Plateau. *Geochim. Cosmochim. Ac.* **2014**, *142*, 64-74.
17. Stubbins, A.; Spencer, R. G. M.; Chen, H. M.; Hatcher, P. G.; Mopper, K.; Hernes, P. J.; Mwamba, V. L.; Mangangu, A. M.; Wabakanghanzi, J. N.; Six, J., Illuminated darkness: Molecular signatures of Congo River

- dissolved organic matter and its photochemical alteration as revealed by ultrahigh precision mass spectrometry. *Limnol. Oceanogr.* **2010**, *55*, (4), 1467-1477.
18. Stubbins, A.; Lapierre, J. F.; Berggren, M.; Prairie, Y. T.; Dittmar, T.; del Giorgio, P. A., What's in an EEM? Molecular Signatures Associated with Dissolved Organic Fluorescence in Boreal Canada. *Environ. Sci. Technol.* **2014**, *48*, (18), 10598-10606.
19. Bernard, L.; Chapuis-Lardy, L.; Razafimbelo, T.; Razafindrakoto, M.; Pablo, A. L.; Legname, E.; Poulain, J.; Bruls, T.; O'Donohue, M.; Brauman, A.; Chotte, J. L.; Blanchart, E., Endogeic earthworms shape bacterial functional communities and affect organic matter mineralization in a tropical soil. *ISME J.* **2012**, *6*, (1), 213-222.
20. Caporaso, J. G.; Kuczynski, J.; Stombaugh, J.; Bittinger, K.; Bushman, F. D.; Costello, E. K.; Fierer, N.; Pena, A. G.; Goodrich, J. K.; Gordon, J. I.; Huttley, G. A.; Kelley, S. T.; Knights, D.; Koenig, J. E.; Ley, R. E.; Lozupone, C. A.; McDonald, D.; Muegge, B. D.; Pirrung, M.; Reeder, J.; Sevinsky, J. R.; Tumbaugh, P. J.; Walters, W. A.; Widmann, J.; Yatsunenko, T.; Zaneveld, J.; Knight, R., QIIME allows analysis of high-throughput community sequencing data. *Nat. Methods* **2010**, *7*, (5), 335-336.
21. Schloss, P. D.; Westcott, S. L., Assessing and improving methods used in operational taxonomic unit-based approaches for 16S rRNA gene sequence analysis. *Appl. Environ. Microbiol.* **2011**, *77*, (10), 3219-3226.
22. Quast, C.; Pruesse, E.; Yilmaz, P.; Gerken, J.; Schweer, T.; Yarza, P.; Peplies, J.; Glockner, F. O., The SILVA ribosomal RNA gene database project: improved data processing and web-based tools. *Nucleic Acids Res.* **2013**, *41*, (D1), D590-D596.
23. Noda, I.; Ozaki, Y., *Two-dimensional correlation spectroscopy: applications in vibrational and optical spectroscopy*. John Wiley and Sons Inc. London: 2005.
24. He, X. S.; Xi, B. D.; Li, W. T.; Gao, R. T.; Zhang, H.; Tan, W. B.; Huang, C. H., Insight into the composition and evolution of compost-derived dissolved organic matter using high-performance liquid chromatography combined with Fourier transform infrared and nuclear magnetic resonance spectra. *J. Chromatogr. A* **2015**, *1420*, 83-91.
